# Supplementary material for: Loss of Myeloid-Specific TGF-β Signaling Decreases CTHRC1 to Downregulate bFGF and the Development of H1993-Induced Osteolytic Bone Lesions
Source: PubMed Central journal article supplement (PMC6315699; doi:10.3390/cancers10120463), 2018-11-22
Supplement: cancers-10-00463-s001.pdf [file cancers-10-00463-s001.pdf]

## Supplemental Materials: Myeloid-Specific TGF- $\beta$ Signaling Stimulates CTHRC1 and Non-Small Cell Lung Cancer Bone Lesions in a bFGF-Dependent Manner

Sourik S. Ganguly, Paul G. Daft, Jingchen Cao, Xiangqi Meng, Zhendong A. Zhong, Alexandra Vander Ark, Austin Meadows, Zach Madaj, Bart Williams and Xiaohong Li

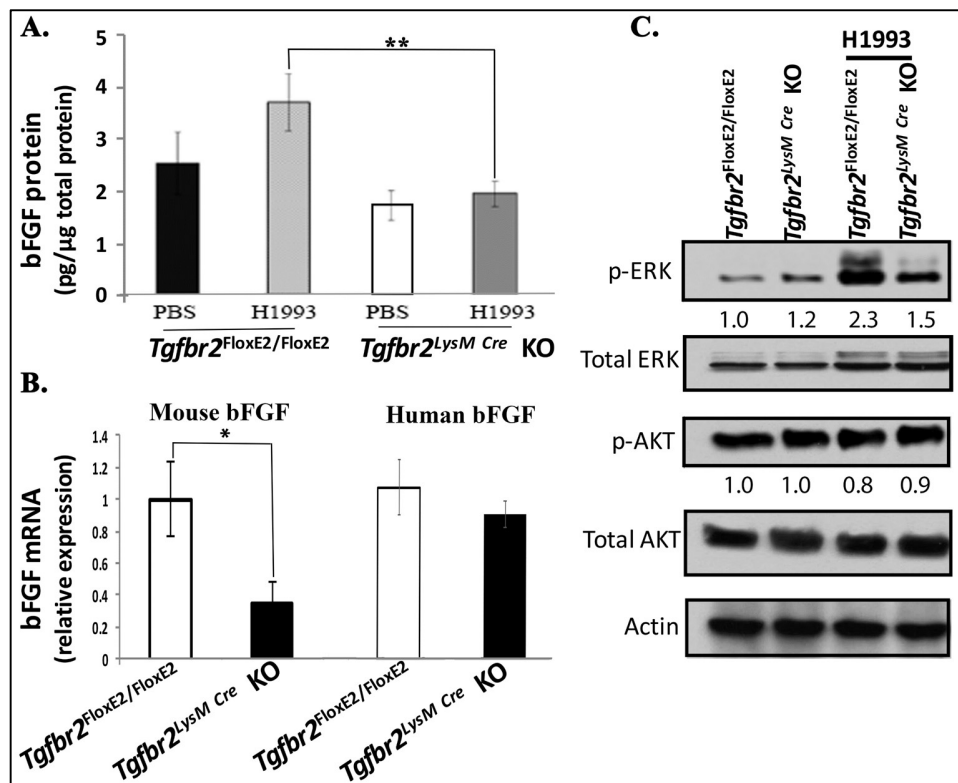

**Figure S1.** Mouse bFGF expression was decreased in *Tgfr2*<sup>LysMCre</sup> KO tibiae injected with H1993 cells. **A.** ELISA of bFGF from H1993-injected mouse tibiae. **B.** qRT-PCR using mouse species-specific bFGF primers. **C.** Representative western blot using H1993-injected and non-injected mouse tibiae. Numbers under each blot are relative quantification of the densities normalized to actin. In the relative quantification for p-ERK and p-AKT, the densities were further normalized to the respective total proteins. Mean  $\pm$  S.D.,  $n \geq 3$  per group. \* $p \leq 0.05$ , \*\* $p \leq 0.01$  by Student's *t*-test.

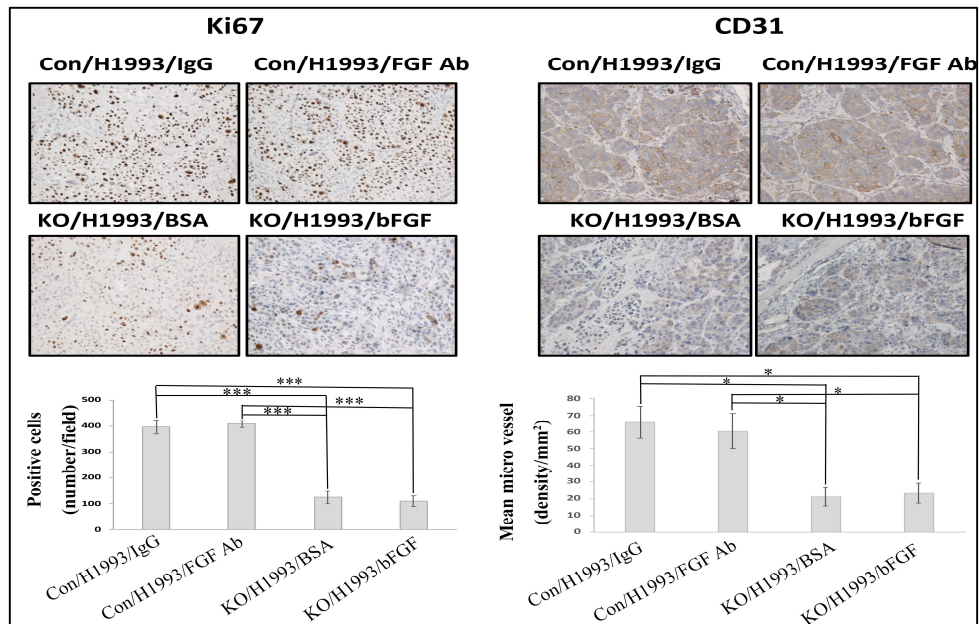

**Figure S2.** bFGF had no effects on proliferation or angiogenesis in H1993 tumors in tibiae. Representative images of IHC staining for Ki67 and CD31 (20 $\times$ ) and quantifications of the positive staining. Mean  $\pm$  S.D.,  $n \geq 7$ . \*\*\* $p < 0.001$ , \* $p \leq 0.05$ , by ANOVA.

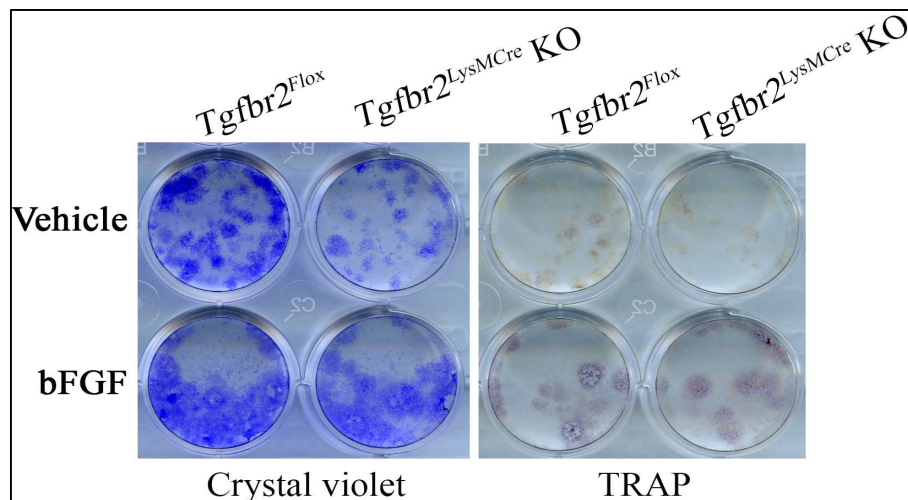

**Figure S3.** bFGF induced osteoclastogenesis. Representative images of osteoclast differentiation from mouse bone marrow. TRAP staining shows the differentiated osteoclasts, and crystal violet staining shows all cells. Experiments were repeated at least three times with the same results. More than six mice per group were used for collecting bone marrow.

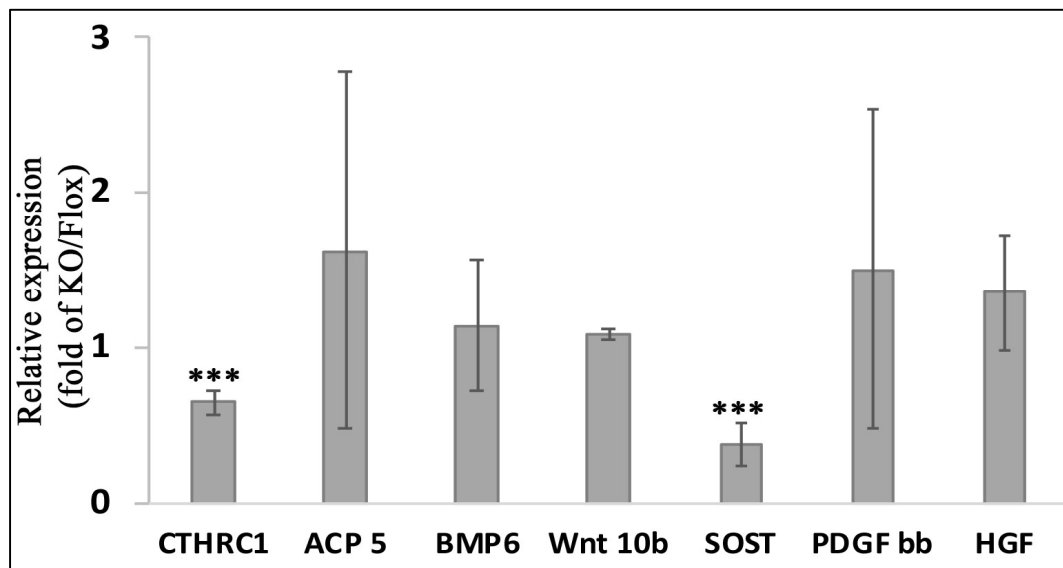

**Figure S4.** Relative expressions of clastokines of osteoclasts from *Tgfb2<sup>flloxE2/flloxE2</sup>* and *Tgfb2<sup>LysMCre</sup>* KO mice. Primary osteoclasts were cultured from *Tgfb2<sup>LysMCre</sup>* KO and littermate controls. *ACP5* is the gene name for TRAP.  $n = 3$ ; three pairs of littermates were used. \*\*\* $p < 0.001$ , by Student's *t*-test.

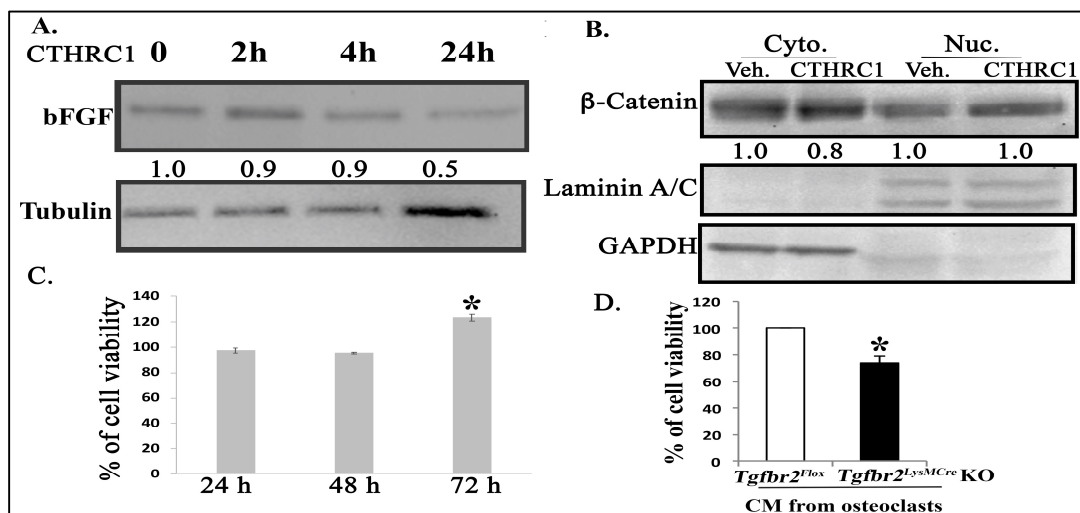

**Figure S5.** Effects of CTHRC1 on H193 cells. **A.** CTHRC1 did not increase bFGF expression. H193 cells were treated with recombinant Cthrc1 (100 ng/mL) for various times and total cell lysates were western blotted for bFGF and tubulin. **B.** CTHRC1 did not change the amount of β-catenin. H193 cells were treated with recombinant Cthrc1 for 48 h, and cytoplasmic (Cyto.) and nuclear (Nuc.) proteins were extracted for western blotting. Numbers under each blot are relative quantification of the densities normalized to tubulin for total protein, GAPDH for Cyto. proteins, or laminin A/C for Nuc. proteins. **C.** CTHRC1 increased cell viability. H193 cells were treated with recombinant Cthrc1 for various times. Cell viability is relative to vehicle control at the same time points. **D.** Osteoclast conditioned media from *Tgfb2<sup>LysMCre</sup>* KO mice decreased cell viability. H193 cells were incubated for 24 h with conditioned medium from primary osteoclasts cultured from *Tgfb2<sup>LysMCre</sup>* KO and littermate control mice. Relative cell viabilities were analyzed by MTT assay. Mean ± S.D.,  $n = 3$ . \* $p \leq 0.05$ , by Student's *t*-test. More than 12 mice were used for collecting bone marrow.

**Table S1.** Information of the antibodies used.

| Name             | Cat #    | Company                   | Dilution | Application |
|------------------|----------|---------------------------|----------|-------------|
| $\beta$ -Catenin | 9562     | Cell Signaling Technology | 1:1000   | WB          |
| Total AKT        | 4691S    |                           | 1:1000   | WB          |
| Total ERK        | 4695S    |                           | 1:4000   | WB          |
| FGFR1            | 9740     |                           | 1:1000   | WB          |
| p-AKT            | 4060S    |                           | 1:1000   | WB          |
| p-ERK            | 4370S    |                           | 1:1000   | WB          |
| DVL2             | 3216     |                           | 1:1000   | WB          |
| bFGF             | 05-118   | Millipore                 | 1:1000   | WB          |
| $\beta$ -actin   | SC-1615  | Santa Cruz                | 1:2000   | WB          |
| TGFBR2           | SC400    |                           | 1:500    | WB          |
| GAPDH            | SC365062 |                           | 1:10,000 |             |
| Tubulin          | T9026    | Sigma                     | 1:10,000 | WB          |
| Ki-67            | RM-9106  | Thermo Scientific         | 1:100    | IHC         |
| CD31             | Ab28364  | Abcam                     | 1:1000   | IHC         |
| CTHRC1           | Ab192778 |                           | 1:200    | WB          |

IHC: Immunohistochemistry; WB: Western Blot.

**Table S2.** List of the primers' sequences.

| Gene          | Species | Sequence (5'-3')                                                     |
|---------------|---------|----------------------------------------------------------------------|
| <i>bFGF</i>   | Mouse   | Forward: GACCCACACGTCAAACTACA<br>Reverse: GCCGTCCATCTTCCTTCATAG      |
|               | Human   | Forward: GACCCTCACATCAAGCTACAA<br>Reverse: AGCCAGTAATCTTCCATCTTCC    |
| <i>CTHRC1</i> | Mouse   | Forward: CTGCTACAGTTGTCCGCACC<br>Reverse: GGCCTTGTAGACACATTCCATT     |
|               | Mouse   | Forward: GTACACTCCAGGTCTACCACC<br>Reverse: TCCTCAGTGTAGCCCAAGA       |
| <i>GAPDH</i>  | Human   | Forward: TGGGTCTCCTCTGACTTCAAC<br>Reverse: CCTGTTGCTGTAGCCAAATTC     |
|               | Mouse   | Forward: GCAGTATCTTCAGGACGAGAAC<br>Reverse: TCCATAGTGAAACCGCAAGTAG   |
| <i>BMP6</i>   | Mouse   | Forward: CGCACCAACCAAAGTGAATG<br>Reverse: CACAAGCTCTCACGACCATATT     |
|               | Mouse   | Forward: GCTGAGCAGAGCCATCTTTAT<br>Reverse: CTCAAAGTAAACCAGCTCTCCA    |
| <i>SOST</i>   | Mouse   | Forward: GGCAAGCCTTCAGGAATGA<br>Reverse: GGTTCATGGTCTGGTTGTTCT       |
|               | Mouse   | Forward: TGCACAGAGACTCCGTAGAT<br>Reverse: CTCGAGATGAGCTTCCAACTC      |
| <i>HGF</i>    | Mouse   | Forward: CTGGCCTCTTCTATGGCTATTAC<br>Reverse: ATCCCAAATCGT CCTGGTATTT |
